# Supplementary material
Source: HighWire-hosted journal article supplement (https://bmjopen.bmj.com/content/7/3/e015266)
Supplement: inline-supplementary-material-1 [file inline-supplementary-material-1.pdf]

# Appendix 1: List of read codes used by GP practices to search records for potential participants

| Read code | Read term                                                  |
|-----------|------------------------------------------------------------|
| E2B..00   | Depressive disorder NEC                                    |
| 1BT..11   | Low mood                                                   |
| E200300   | Anxiety with depression                                    |
| Eu32z11   | [X]Depression NOS                                          |
| 1B17.00   | Depressed                                                  |
| 1465      | H/O: depression                                            |
| 1B17.11   | C/O - feeling depressed                                    |
| Eu32.00   | [X]Depressive episode                                      |
| E204.00   | Neurotic depression reactive type                          |
| 1BT..00   | Depressed mood                                             |
| 1B1U.00   | Symptoms of depression                                     |
| E204.11   | Postnatal depression                                       |
| 2257      | O/E - depressed                                            |
| Eu32100   | [X]Moderate depressive episode                             |
| E113.11   | Endogenous depression - recurrent                          |
| Eu32z00   | [X]Depressive episode, unspecified                         |
| 1BO..00   | Mood swings                                                |
| Eu32z14   | [X] Reactive depression NOS                                |
| E112.13   | Endogenous depression first episode                        |
| E112.14   | Endogenous depression                                      |
| 1B1J.11   | Emotional upset                                            |
| E2B1.00   | Chronic depression                                         |
| E112.11   | Agitated depression                                        |
| E112.00   | Single major depressive episode                            |
| E135.00   | Agitated depression                                        |
| E113700   | Recurrent depression                                       |
| Eu32000   | [X]Mild depressive episode                                 |
| Eu33.00   | [X]Recurrent depressive disorder                           |
| Eu41200   | [X]Mixed anxiety and depressive disorder                   |
| Eu32200   | [X]Severe depressive episode without psychotic symptoms    |
| 1B1U.11   | Depressive symptoms                                        |
| E113.00   | Recurrent major depressive episode                         |
| Eu32z12   | [X]Depressive disorder NOS                                 |
| Eu3..00   | [X]Mood - affective disorders                              |
| E112.12   | Endogenous depression first episode                        |
| Eu32400   | [X]Mild depression                                         |
| Eu32.11   | [X]Single episode of depressive reaction                   |
| E113200   | Recurrent major depressive episodes, moderate              |
| Eu34100   | [X]Dysthymia                                               |
| E112200   | Single major depressive episode, moderate                  |
| Eu32.13   | [X]Single episode of reactive depression                   |
| E112100   | Single major depressive episode, mild                      |
| Eu33100   | [X]Recurrent depressive disorder, current episode moderate |
| Eu34114   | [X]Persistant anxiety depression                           |
| Eu41211   | [X]Mild anxiety depression                                 |
| E290.00   | Brief depressive reaction                                  |
| Eu53011   | [X]Postnatal depression NOS                                |

|         |                                                              |
|---------|--------------------------------------------------------------|
| Eu33.13 | [X]Recurrent episodes of reactive depression                 |
| 1BQ..00 | Loss of capacity for enjoyment                               |
| E11z200 | Masked depression                                            |
| Eu33z00 | [X]Recurrent depressive disorder, unspecified                |
| Eu34113 | [X]Neurotic depression                                       |
| Eu33.11 | [X]Recurrent episodes of depressive reaction                 |
| E112z00 | Single major depressive episode NOS                          |
| E291.00 | Prolonged depressive reaction                                |
| Eu43012 | [X]Acute reaction to stress                                  |
| Eu32y00 | [X]Other depressive episodes                                 |
| E113z00 | Recurrent major depressive episode NOS                       |
| Eu43z00 | [X]Reaction to severe stress, unspecified                    |
| E112300 | Single major depressive episode, severe, without psychosis   |
| 1BT..12 | Sad mood                                                     |
| Eu33200 | [X]Recurr depress disorder cur epi severe without psyc sympt |
| Eu33000 | [X]Recurrent depressive disorder, current episode mild       |
| 1JJ..00 | Suspected depression                                         |
| E113100 | Recurrent major depressive episodes, mild                    |
| Eu32212 | [X]Single episode major depression w/out psychotic symptoms  |
| Eu34111 | [X]Depressive neurosis                                       |
| Eu32700 | [X]Major depression, severe without psychotic symptoms       |
| E113300 | Recurrent major depressive episodes, severe, no psychosis    |
| E112000 | Single major depressive episode, unspecified                 |
| Eu32600 | [X]Major depression, moderately severe                       |
| Eu33211 | [X]Endogenous depression without psychotic symptoms          |
| 1BP0.00 | Loss of interest in previously enjoyable activity            |
| Eu33.12 | [X]Recurrent episodes of psychogenic depression              |
| Eu4..00 | [X]Neurotic, stress - related and somoform disorders         |
| E113600 | Recurrent major depressive episodes, in full remission       |
| Eu33400 | [X]Recurrent depressive disorder, currently in remission     |
| Eu3z.00 | [X]Unspecified mood affective disorder                       |
| Eu32.12 | [X]Single episode of psychogenic depression                  |
| Eu32z13 | [X]Prolonged single episode of reactive depression           |
| 1BU..00 | Loss of hope for the future                                  |
| E113000 | Recurrent major depressive episodes, unspecified             |
| Eu32500 | [X]Major depression, mild                                    |
| Eu32y11 | [X]Atypical depression                                       |
| E112500 | Single major depressive episode, partial or unspec remission |
| Eu33212 | [X]Major depression, recurrent without psychotic symptoms    |
| Eu53012 | [X]Postpartum depression NOS                                 |
| 1S40.00 | Dysphoric mood                                               |
| E284.00 | Stress reaction causing mixed disturbance of emotion/conduct |
| ZV11100 | [V]Personal history of affective disorder                    |
| E113500 | Recurrent major depressive episodes,partial/unspec remission |
| E11y200 | Atypical depressive disorder                                 |
| Eu3y111 | [X]Recurrent brief depressive episodes                       |
| Eu33y00 | [X]Other recurrent depressive disorders                      |
| Eu43y00 | [X]Other reactions to severe stress                          |
| E112600 | Single major depressive episode, in full remission           |
| Eu32211 | [X]Single episode agitated depressn w/out psychotic symptoms |

|         |                                                             |
|---------|-------------------------------------------------------------|
| Eu34.00 | [X]Persistent mood affective disorders                      |
| E290z00 | Brief depressive reaction NOS                               |
| E292.00 | Adjustment reaction, predominant disturbance other emotions |
| E283z00 | Other acute stress reaction NOS                             |
| Eu92.11 | [X]Emotional behavioural problems                           |
| Eu3y.00 | [X]Other mood affective disorders                           |
| Eu3y000 | [X]Other single mood affective disorders                    |
| E292400 | Adjustment reaction with anxious mood                       |
| Eu32y12 | [X]Single episode of masked depression NOS                  |
| Eu3y100 | [X]Other recurrent mood affective disorders                 |
| E292z00 | Adjustment reaction with disturbance of other emotion NOS   |
| Eu34z00 | [X]Persistent mood affective disorder, unspecified          |
| E2C4z00 | Mixed disturbance of conduct and emotion NOS                |
| Eu32213 | [X]Single episode vital depression w/out psychotic symptoms |
| Eu33z11 | [X]Monopolar depression NOS                                 |
| Eu3yy00 | [X]Other specified mood affective disorders                 |
| Eu32B00 | [X]Antenatal depression                                     |
| Eu33214 | [X]Vital depression, recurrent without psychotic symptoms   |
| Eu34y00 | [X]Other persistent mood affective disorders                |
