# Supplementary material
Source: HighWire-hosted journal article supplement (https://bmjopen.bmj.com/content/7/3/e015266)
Supplement: inline-supplementary-material-2 [file inline-supplementary-material-2.pdf]

## Appendix 2: Advice given to GPs about the meaning of PROM scores

### PHQ-9 Scores and Proposed Treatment Actions

(Adapted from Kroenke K, Spitzer RL, Psychiatric Annals 2002;32:509-521)

#### PHQ-9 scores at diagnosis

| PHQ-9 Score | Depression Severity | Proposed Treatment Actions                            |
|-------------|---------------------|-------------------------------------------------------|
| 0 – 4       | None-minimal        | None                                                  |
| 5 – 9       | Mild                | Watchful waiting; repeat PHQ-9 at follow-up           |
| 10 – 14*    | Moderate            | Psychological Treatment and follow-up/Antidepressants |
| 15 – 19     | Moderately Severe   | Antidepressants and Psychological Treatment           |
| 20 – 27     | Severe              | Referral to mental health                             |

\* Question B must be answered positively, i.e. the symptoms have made it at least somewhat difficult for the patient to do their work, take care of their home, or get along with other people.

#### Changes in PHQ-9 Scores at Follow-up and Proposed Treatment Actions

| Change in PHQ-9 score                                                     | Response            | Treatment actions                                                                           |
|---------------------------------------------------------------------------|---------------------|---------------------------------------------------------------------------------------------|
| Drop of 5 or more points from baseline                                    | Adequate            | No treatment change needed. Continue treatment and follow-up as planned.                    |
| Drop of 2-4 points from baseline.                                         | Probably Inadequate | Often warrants an increase in antidepressant dose; follow-up as planned                     |
| Drop of 1-point, or no change, or increase in score, first follow-up      | Inadequate          | Increase dose or switch drug<br>Refer for psychological treatment<br>Follow-up sooner       |
| Drop of 1-point, or no change, or increase in score, subsequent follow-up | Inadequate          | Increase dose or switch drug<br>Refer for psychological treatment<br>Refer to mental health |

#### Distress Thermometer

The patient marks the thermometer to indicate how much distress they have that week, from 0 to 10. Scores above 4 indicate significant distress needing further exploration and possible action.

## **PSYCHLOPS**

All of the responses in PSYCHLOPS are scored on a six point scale ranging from zero to five. A score of zero indicates the least psychological difficulty whereas a score of five indicates the most psychological difficulty.

The questions which are scored are those relating to Problems (Questions 1b and 2b), Functioning (Question 3b) and Wellbeing (Question 4). Other questions provide useful information but do not contribute to the total score or change score.

The initial score for PSYCHLOPS is unique to each individual. The main purpose of the score is to measure within-person change, i.e. the change in score for the items chosen by the patient.

High scores at diagnosis indicate significant problem areas for the individual patient, and should direct questioning to those areas. Similarly, persistently high scores, or increased scores, at follow-up should direct questioning to those areas of particular concern to the individual patient.
