# Supplementary material
Source: HighWire-hosted journal article supplement (https://bmjopen.bmj.com/content/7/3/e015266)

### Appendix 3: Study intervention and control procedures

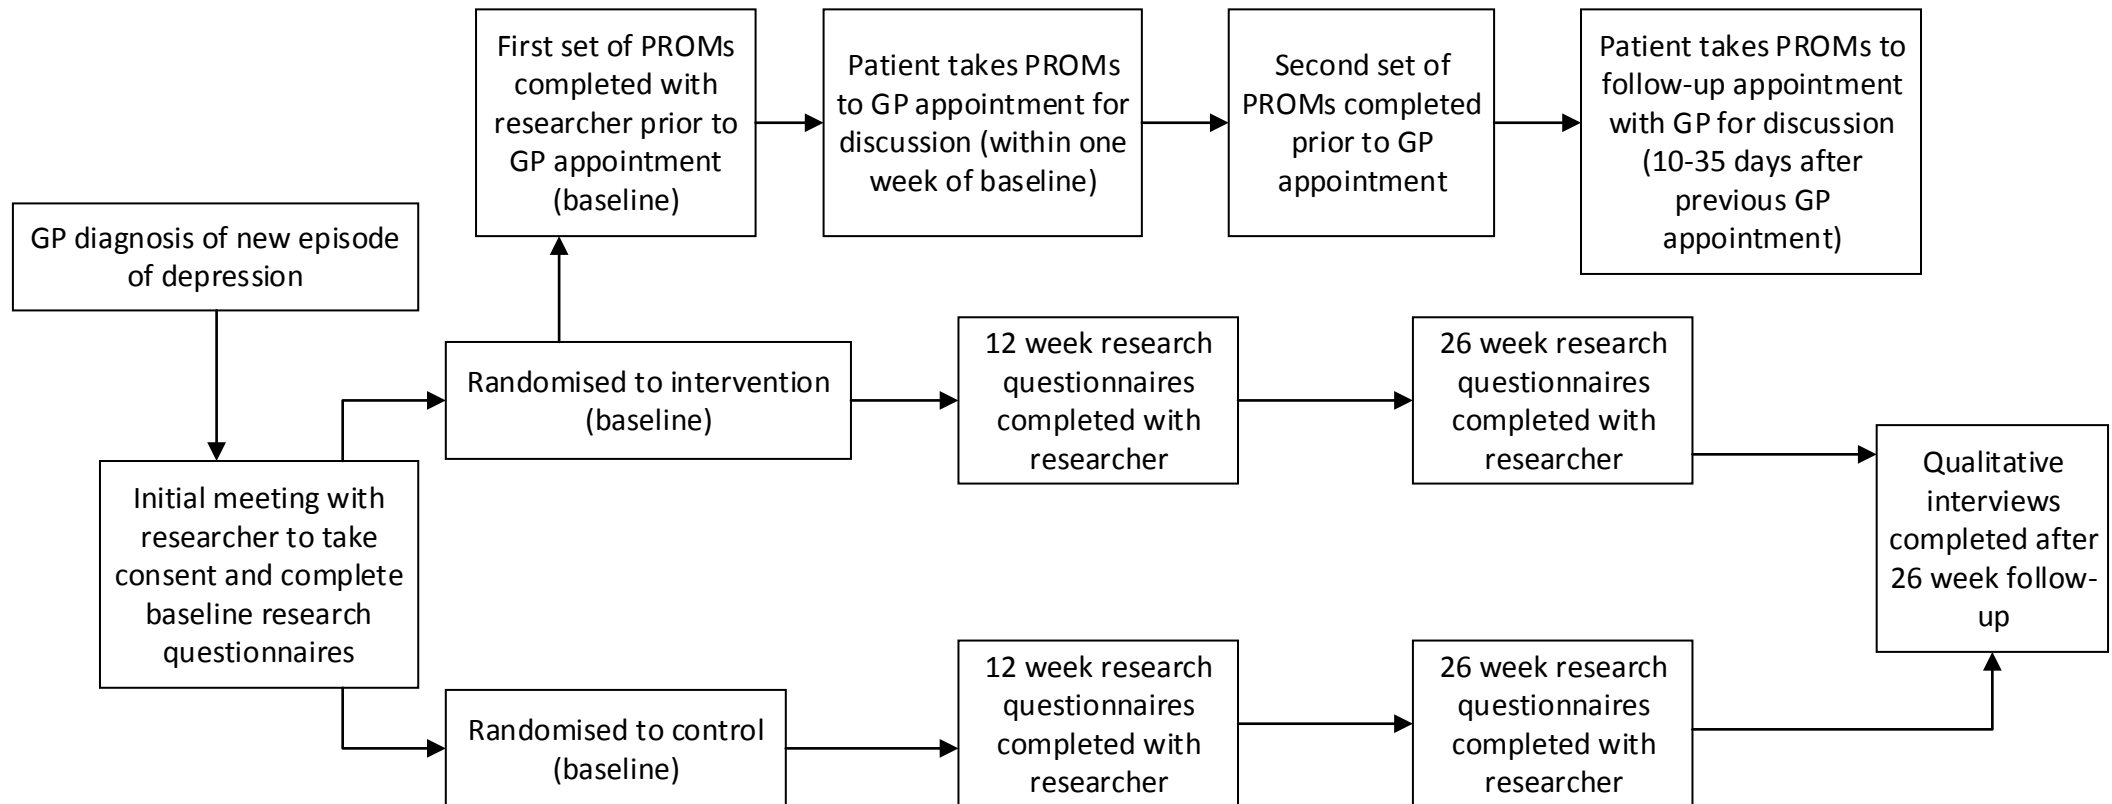

Supplement: inline-supplementary-material-3 [file inline-supplementary-material-3.pdf]
